# Supplementary material for: Thrombectomy With the pRESET vs Solitaire Stent Retrievers as First-Line Large Vessel Occlusion Stroke Treatment: A Randomized Clinical Trial
Source: PubMed Central journal article supplement — JAMA Neurol. 2024 Jan 2;81(2):170–8. doi: 10.1001/jamaneurol.2023.5010 (PMC10762632; doi:10.1001/jamaneurol.2023.5010), 2024-01-02
Supplement: jamaneurol-e235010-s004.pdf [file jamaneurol-e235010-s004.pdf]

## Data Sharing Statement

Nogueira. Thrombectomy With the pRESET vs Solitaire Stent Retrievers as First-Line Large Vessel Occlusion Stroke Treatment. *JAMA Neurol.* Published January 02, 2024.

doi:10.1001/jamaneurol.2023.5010

### Data

**Data available:** Yes

**Data types:** Deidentified participant data

**How to access data:** The data that support the findings of this study are available from the corresponding authors, RGN and RH, upon reasonable request.

**When available:** With publication

### Supporting Documents

**Document types:** None

### Additional Information

**Who can access the data:** researchers whose proposed use of the data has been approved

**Types of analyses:** specified purpose

**Mechanisms of data availability:** after approval of a proposal

**Any additional restrictions:** N/A
